# Supplementary material for: Retracted Article: Olefin epoxidation with chiral salen Mn(iii) immobilized on ZnPS-PVPA upon alkyldiamine
Source: Royal Society of Chemistry journal article supplement (doi:10.1039/c6ra00002a), 2016-01-01
Supplement: c6ra00002a1.pdf [file c6ra00002a1.pdf]

## Supporting Information

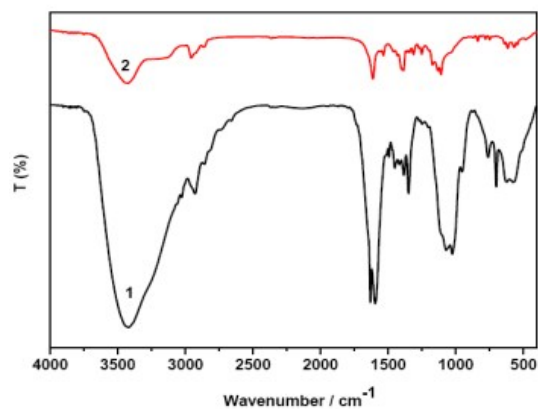

Fig. S1 FT-IR spectra of (1) 4d; (2) the neat chiral salen Mn (III)

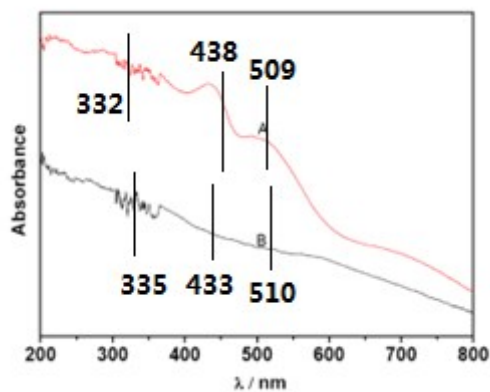

Fig. S2 Solid reflectance UV-vis spectra (A) the neat chiral salen Mn (III);(B)the catalyst 4d

### Thermal gravimetric analysis and powder XRD

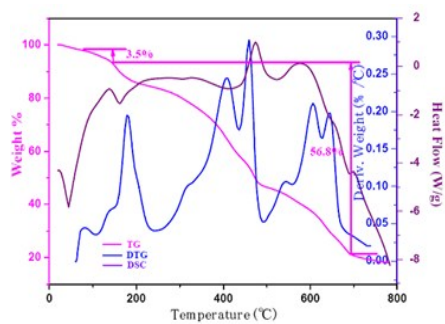

Fig. S3 TG curves of heterogeneous catalyst 4d.

According to 4d (shown in Fig. S3), the initial weight loss is 3.38% below 180°C, which is due to surface-bound or intercalated water in this stage. In the temperature range of 180-700°C, the organic moieties decompose, accompanied with 56.8% weight loss in this stage. Obviously, the catalyst 4d still keep superior stability lower than 180°C. In general, organic reactions of heterogeneous catalysis are carried out below 180°C. Therefore, the catalyst 4d has adequate thermal stabilities to be applied in heterogeneous catalytic reactions.

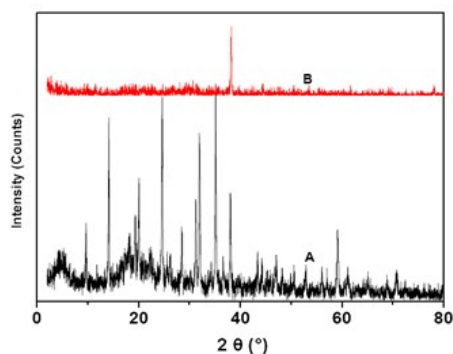

Fig. S4 XRD patterns of the support (A) ZnPS-PVPA and (B) the heterogenous catalyst 4d.

As could be seen from Fig. S4, XRD patterns of ZnPS-PVPA display a broad 001 peak (the lowest-angle diffraction peak in the pattern), accompanied with other peaks at higher-order  $00n$  peaks at larger angles and lower intensities such as at 38.04°. Although the intensities of all peaks decrease after the immobilization of Mn(III) salen complexes, the reflections for ZnPS-PVPA and the catalyst 4d still indicate that the mesoporous structure of the parent supports remain intact upon the modification of alkyldiamine. Apart from this, the amount of Mn(salen) attached onto ZnPS-PVPA is in the range of 0.68-0.76 mmol/g (Mn element) ascertained by AAS.

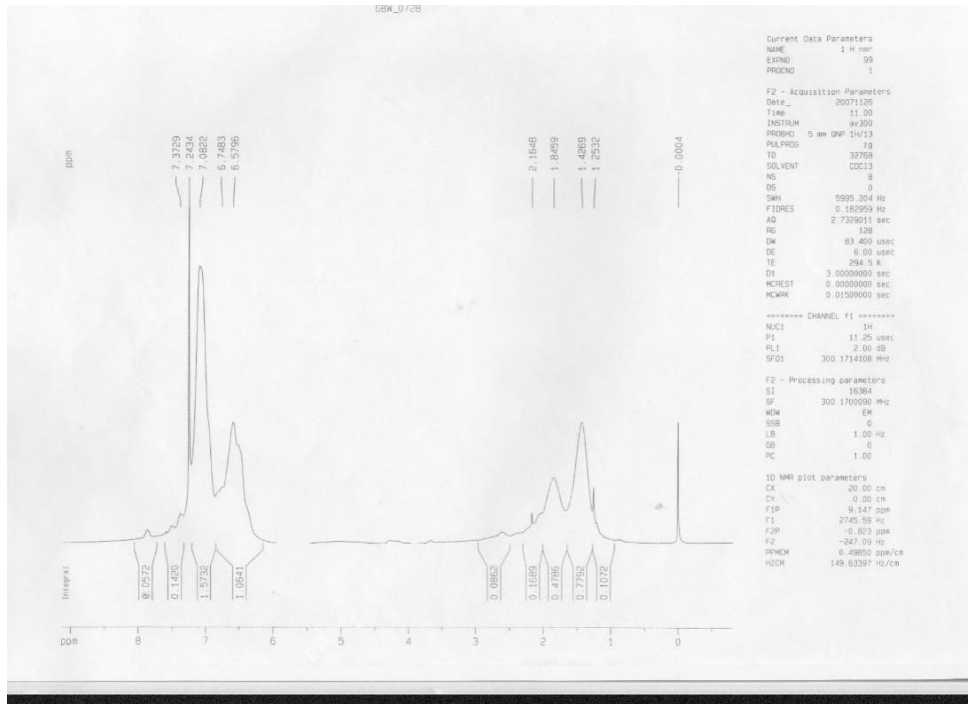

<sup>1</sup>H NMR of PS-PVPA

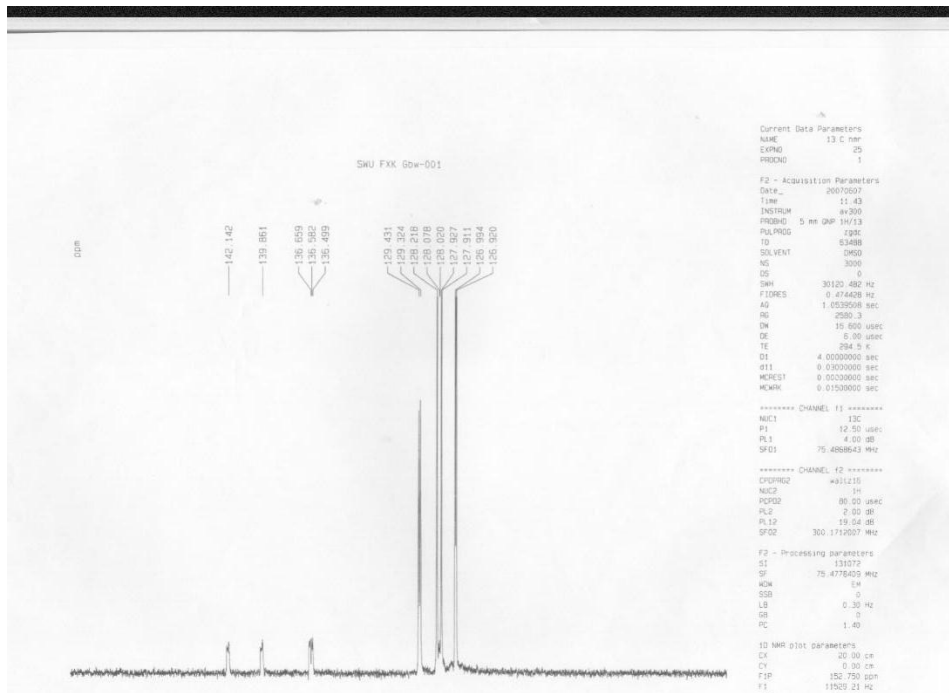

<sup>13</sup>C NMR of PS-PVPA
